# Supplementary material for: A Novel Joint Gene Set Analysis Framework Improves Identification of Enriched Pathways in Cross Disease Transcriptomic Analysis
Source: Front Genet. 2019 Apr 12;10:293. doi: 10.3389/fgene.2019.00293 (PMC6473067; doi:10.3389/fgene.2019.00293)
Supplement: Supplementary file 2 [file Table_2.XLSX]

## Sheet: Additional file 2A
Additional file 2A. Colorectal adenocarcinoma related KEGG pathway p-values and FDR of single data set analysis and JointNormKS
Pathway	singleNormKS p	singleNormKS FDR	jointNormKS p	jointNormKS FDR
KEGG_CELL_CYCLE	2.01816e-06	0.000125	2.01816e-06	0.000142857
KEGG_P53_SIGNALING_PATHWAY	0.00914024	0.0774186	0.00834307	0.0706665
KEGG_APOPTOSIS	0.0920281	0.319999	0.0732249	0.28173
KEGG_TGF_BETA_SIGNALING_PATHWAY	0.256143	0.59032	0.150464	0.427856
KEGG_WNT_SIGNALING_PATHWAY	0.288395	0.621794	0.245237	0.56848
KEGG_MAPK_SIGNALING_PATHWAY	0.31652	0.652123	0.267073	0.596692
KEGG_ERBB_SIGNALING_PATHWAY	0.737538	0.952102	0.604866	0.869063
KEGG_MTOR_SIGNALING_PATHWAY	0.900807	0.996182	0.795581	0.947844

## Sheet: Additional file 2B
Additional file 2B. Enriched pathways identified by JointNormKS and/or single data set analysis in colorectal adenocarcinoma data set
Pathway	single FDR	JointNormKS FDR	Category
KEGG_CITRATE_CYCLE_TCA_CYCLE	0.0666971	0.0650441	Common
KEGG_FATTY_ACID_METABOLISM	0.00497777	0.00749998	Common
KEGG_OXIDATIVE_PHOSPHORYLATION	0.000347825	0.00172727	Common
KEGG_PURINE_METABOLISM	0.0014074	0.00348386	Common
KEGG_PYRIMIDINE_METABOLISM	0.00915383	0.00803998	Common
KEGG_VALINE_LEUCINE_AND_ISOLEUCINE_DEGRADATION	0.0115185	0.0110741	Common
KEGG_BETA_ALANINE_METABOLISM	0.0635741	0.0613785	Common
KEGG_GLUTATHIONE_METABOLISM	0.0177391	0.0159697	Common
KEGG_PORPHYRIN_AND_CHLOROPHYLL_METABOLISM	0.0953104	0.0838078	Common
KEGG_AMINOACYL_TRNA_BIOSYNTHESIS	0.0666971	0.0627522	Common
KEGG_METABOLISM_OF_XENOBIOTICS_BY_CYTOCHROME_P450	0.0819502	0.0627522	Common
KEGG_DRUG_METABOLISM_CYTOCHROME_P450	0.0666971	0.0617523	Common
KEGG_DRUG_METABOLISM_OTHER_ENZYMES	0.069649	0.0627522	Common
KEGG_RNA_POLYMERASE	0.00890194	0.00823075	Common
KEGG_DNA_REPLICATION	0.000125	0.000499999	Common
KEGG_SPLICEOSOME	0.0125574	0.0124138	Common
KEGG_PROTEASOME	0.0317701	0.0463749	Common
KEGG_BASE_EXCISION_REPAIR	0.0670795	0.0632499	Common
KEGG_MISMATCH_REPAIR	0.0360227	0.0333882	Common
KEGG_CELL_CYCLE	0.000125	0.000142857	Common
KEGG_P53_SIGNALING_PATHWAY	0.0774186	0.0706665	Common
KEGG_ALZHEIMERS_DISEASE	0.0217027	0.0227692	Common
KEGG_PARKINSONS_DISEASE	0.00123077	0.00287999	Common
KEGG_HUNTINGTONS_DISEASE	0.0282469	0.0181111	Common
KEGG_COLORECTAL_CANCER	0.0302558	0.0333882	Common
BIOCARTA_MCM_PATHWAY	0.00436841	0.00389473	Common
BIOCARTA_G2_PATHWAY	0.0044186	0.00691303	Common
BIOCARTA_CXCR4_PATHWAY	0.0374564	0.0433683	Common
BIOCARTA_HIVNEF_PATHWAY	0.0611514	0.0731165	Common
BIOCARTA_PROTEASOME_PATHWAY	0.0182253	0.0169577	Common
BIOCARTA_ATRBRCA_PATHWAY	0.0302558	0.0320481	Common
BIOCARTA_CARDIACEGF_PATHWAY	0.0819502	0.0632499	Common
PID_FANCONI_PATHWAY	0.0819502	0.0675999	Common
PID_SMAD2_3NUCLEAR_PATHWAY	0.0831146	0.0764261	Common
PID_AURORA_B_PATHWAY	0.0106792	0.0124138	Common
PID_P73PATHWAY	0.0302558	0.0268395	Common
PID_E2F_PATHWAY	0.000299999	0.000899998	Common
PID_HIF2PATHWAY	0.000347825	0.00173913	Common
PID_ATR_PATHWAY	0.0155555	0.0159697	Common
PID_AR_PATHWAY	0.0044186	0.00410256	Common
PID_MYC_ACTIV_PATHWAY	0.000299999	0.000555554	Common
PID_ILK_PATHWAY	0.0641746	0.0579207	Common
PID_ATM_PATHWAY	0.0666971	0.0585685	Common
PID_HDAC_CLASSI_PATHWAY	0.0302558	0.0274146	Common
PID_PLK1_PATHWAY	0.00187096	0.00348386	Common
PID_P53_DOWNSTREAM_PATHWAY	0.0182253	0.0152459	Common
PID_AR_TF_PATHWAY	0.0541236	0.0567272	Common
PID_FOXM1_PATHWAY	0.00294117	0.00375757	Common
PID_CMYB_PATHWAY	0.0750861	0.0658069	Common
PID_HIV_NEF_PATHWAY	0.0494374	0.0632499	Common
PID_AURORA_A_PATHWAY	0.00171428	0.00299999	Common
PID_TAP63_PATHWAY	0.0125574	0.0169577	Common
PID_BARD1_PATHWAY	0.002	0.00374999	Common
PID_P53_REGULATION_PATHWAY	0.0878448	0.0747602	Common
REACTOME_ACTIVATION_OF_THE_PRE_REPLICATIVE_COMPLEX	0.000347825	0.00133333	Common
REACTOME_BASE_EXCISION_REPAIR	0.00333333	0.00383783	Common
REACTOME_METABOLISM_OF_NON_CODING_RNA	0.000125	0.000555554	Common
REACTOME_TCA_CYCLE_AND_RESPIRATORY_ELECTRON_TRANSPORT	0.000299999	0.000842104	Common
REACTOME_G0_AND_EARLY_G1	0.0221866	0.0196052	Common
REACTOME_RESOLUTION_OF_AP_SITES_VIA_THE_MULTIPLE_NUCLEOTIDE_PATCH_REPLACEMENT_PATHWAY	0.0168656	0.0159697	Common
REACTOME_CELL_CYCLE	0.000125	0.000142857	Common
REACTOME_ORC1_REMOVAL_FROM_CHROMATIN	0.00586955	0.00803998	Common
REACTOME_EXTRACELLULAR_MATRIX_ORGANIZATION	0.0367999	0.0346896	Common
REACTOME_REGULATORY_RNA_PATHWAYS	0.074939	0.0689481	Common
REACTOME_PROCESSING_OF_CAPPED_INTRON_CONTAINING_PRE_MRNA	0.00104	0.00216666	Common
REACTOME_RNA_POL_II_TRANSCRIPTION	0.0670795	0.0427526	Common
REACTOME_PROCESSIVE_SYNTHESIS_ON_THE_LAGGING_STRAND	0.0170882	0.0169577	Common
REACTOME_CELL_CYCLE_MITOTIC	0.000125	0.000142857	Common
REACTOME_CYTOSOLIC_TRNA_AMINOACYLATION	0.00294117	0.0037647	Common
REACTOME_CELL_CYCLE_CHECKPOINTS	0.000125	0.000142857	Common
REACTOME_TRNA_AMINOACYLATION	0.00372972	0.00383783	Common
REACTOME_CYCLIN_E_ASSOCIATED_EVENTS_DURING_G1_S_TRANSITION_	0.0367999	0.0346896	Common
REACTOME_P53_DEPENDENT_G1_DNA_DAMAGE_RESPONSE	0.0864919	0.0960308	Common
REACTOME_MRNA_PROCESSING	0.0017931	0.00303703	Common
REACTOME_ASSOCIATION_OF_TRIC_CCT_WITH_TARGET_PROTEINS_DURING_BIOSYNTHESIS	0.0277999	0.025848	Common
REACTOME_METABOLISM_OF_NUCLEOTIDES	0.0161538	0.0159697	Common
REACTOME_METABOLISM_OF_PROTEINS	0.0252564	0.0192533	Common
REACTOME_M_G1_TRANSITION	0.000999998	0.00324137	Common
REACTOME_MRNA_SPLICING	0.00890194	0.00823075	Common
REACTOME_MRNA_SPLICING_MINOR_PATHWAY	0.0235263	0.0268395	Common
REACTOME_PROCESSING_OF_CAPPED_INTRONLESS_PRE_MRNA	0.00468181	0.00492682	Common
REACTOME_G1_S_TRANSITION	0.000125	0.000142857	Common
REACTOME_CITRIC_ACID_CYCLE_TCA_CYCLE	0.0198611	0.0192533	Common
REACTOME_TRANSPORT_OF_MATURE_MRNA_DERIVED_FROM_AN_INTRONLESS_TRANSCRIPT	0.0819502	0.0731165	Common
REACTOME_CYCLIN_A_B1_ASSOCIATED_EVENTS_DURING_G2_M_TRANSITION	0.0044186	0.00586045	Common
REACTOME_CDT1_ASSOCIATION_WITH_THE_CDC6_ORC_ORIGIN_COMPLEX	0.0670795	0.0948123	Common
REACTOME_SYNTHESIS_OF_DNA	0.000125	0.000142857	Common
REACTOME_SMOOTH_MUSCLE_CONTRACTION	0.0572958	0.0400651	Common
REACTOME_METABOLISM_OF_RNA	0.00651063	0.00514285	Common
REACTOME_MITOTIC_G1_G1_S_PHASES	0.000125	0.000142857	Common
REACTOME_REGULATION_OF_MITOTIC_CELL_CYCLE	0.0044186	0.00604544	Common
REACTOME_MITOTIC_M_M_G1_PHASES	0.000125	0.000142857	Common
REACTOME_MITOTIC_G2_G2_M_PHASES	0.0374564	0.0368763	Common
REACTOME_DNA_REPAIR	0.0127097	0.0124138	Common
REACTOME_RESPIRATORY_ELECTRON_TRANSPORT	0.00890194	0.00691303	Common
REACTOME_ASPARAGINE_N_LINKED_GLYCOSYLATION	0.0119322	0.00935847	Common
REACTOME_ASSEMBLY_OF_THE_PRE_REPLICATIVE_COMPLEX	0.0115357	0.0169577	Common
REACTOME_REGULATION_OF_MRNA_STABILITY_BY_PROTEINS_THAT_BIND_AU_RICH_ELEMENTS	0.0272911	0.0433683	Common
REACTOME_KINESINS	0.0839518	0.0731165	Common
REACTOME_LAGGING_STRAND_SYNTHESIS	0.0119322	0.0124138	Common
REACTOME_DNA_REPLICATION	0.000125	0.000142857	Common
REACTOME_CLEAVAGE_OF_GROWING_TRANSCRIPT_IN_THE_TERMINATION_REGION_	0.0635741	0.0579207	Common
REACTOME_E2F_MEDIATED_REGULATION_OF_DNA_REPLICATION	0.00308571	0.00383783	Common
REACTOME_PURINE_METABOLISM	0.0018	0.00321428	Common
REACTOME_APOPTOSIS	0.0666971	0.0524535	Common
REACTOME_NEP_NS2_INTERACTS_WITH_THE_CELLULAR_EXPORT_MACHINERY	0.0248571	0.0216623	Common
REACTOME_HIV_INFECTION	0.0115357	0.0138666	Common
REACTOME_TRANSPORT_OF_RIBONUCLEOPROTEINS_INTO_THE_HOST_NUCLEUS	0.0666971	0.0617523	Common
REACTOME_HIV_LIFE_CYCLE	0.0119322	0.0126779	Common
REACTOME_ABORTIVE_ELONGATION_OF_HIV1_TRANSCRIPT_IN_THE_ABSENCE_OF_TAT	0.038129	0.0379999	Common
REACTOME_HOST_INTERACTIONS_OF_HIV_FACTORS	0.0217027	0.0189041	Common
REACTOME_RESPIRATORY_ELECTRON_TRANSPORT_ATP_SYNTHESIS_BY_CHEMIOSMOTIC_COUPLING_AND_HEAT_PRODUCTION_BY_UNCOUPLING_PROTEINS_	0.000299999	0.000499999	Common
REACTOME_LATE_PHASE_OF_HIV_LIFE_CYCLE	0.0425531	0.038912	Common
REACTOME_INTERACTIONS_OF_VPR_WITH_HOST_CELLULAR_PROTEINS	0.0159375	0.0169577	Common
REACTOME_APC_C_CDH1_MEDIATED_DEGRADATION_OF_CDC20_AND_OTHER_APC_C_CDH1_TARGETED_PROTEINS_IN_LATE_MITOSIS_EARLY_G1	0.0456525	0.0565101	Common
REACTOME_ACTIVATION_OF_ATR_IN_RESPONSE_TO_REPLICATION_STRESS	0.000125	0.000142857	Common
REACTOME_APC_C_CDC20_MEDIATED_DEGRADATION_OF_MITOTIC_PROTEINS	0.0302558	0.0357272	Common
REACTOME_MITOTIC_PROMETAPHASE	0.000125	0.000142857	Common
REACTOME_G1_S_SPECIFIC_TRANSCRIPTION	0.016303	0.0159697	Common
REACTOME_GLUTATHIONE_CONJUGATION	0.0670795	0.0627522	Common
REACTOME_PHASE_II_CONJUGATION	0.0044186	0.00439999	Common
REACTOME_EXTENSION_OF_TELOMERES	0.00799998	0.00719147	Common
REACTOME_G2_M_CHECKPOINTS	0.000125	0.000142857	Common
REACTOME_S_PHASE	0.000125	0.000142857	Common
REACTOME_SCFSKP2_MEDIATED_DEGRADATION_OF_P27_P21	0.0915998	0.0812579	Common
REACTOME_DNA_STRAND_ELONGATION	0.000125	0.000142857	Common
BIOCARTA_P53_PATHWAY	0.101684	0.09411	JointNormKS
PID_MYC_PATHWAY	0.112753	0.0933649	JointNormKS
REACTOME_TRANSCRIPTION	0.107481	0.0809917	JointNormKS
KEGG_N_GLYCAN_BIOSYNTHESIS	0.0839031	0.135898	Single
BIOCARTA_CELLCYCLE_PATHWAY	0.0839031	0.102046	Single
BIOCARTA_MCALPAIN_PATHWAY	0.0637058	0.12593	Single
WNT_SIGNALING	0.094641	0.108778	Single
REACTOME_CROSS_PRESENTATION_OF_SOLUBLE_EXOGENOUS_ANTIGENS_ENDOSOMES	0.0878448	0.122723	Single
REACTOME_REGULATION_OF_ORNITHINE_DECARBOXYLASE_ODC	0.0878448	0.122723	Single
