# Supplementary material for: A Novel Joint Gene Set Analysis Framework Improves Identification of Enriched Pathways in Cross Disease Transcriptomic Analysis
Source: Front Genet. 2019 Apr 12;10:293. doi: 10.3389/fgene.2019.00293 (PMC6473067; doi:10.3389/fgene.2019.00293)
Supplement: Supplementary file 3 [file Table_3.XLSX]

## Sheet: Additional file 3A
Additional file 3A. AD related KEGG pathway p-values and FDR of single data set analysis and JointNormKS
Pathway	singleNormKS p	singleNormKS FDR	JointNormKS p	JointNormKS FDR
KEGG_OXIDATIVE_PHOSPHORYLATION	1.86741e-06	0.000285	1.86741e-06	0.00025
KEGG_APOPTOSIS	0.00105695	0.01167	0.00077124	0.0087
KEGG_CALCIUM_SIGNALING_PATHWAY	0.178183	0.3	0.137464	0.247

## Sheet: Additional file 3B
Additional file 3B. Enriched pathways identified by JointNormKS and/or single data set analysis in AD data set
Pathway	single FDR	JointNormKS FDR	Category
KEGG_CITRATE_CYCLE_TCA_CYCLE	0.00993476	0.00683543	Common
KEGG_OXIDATIVE_PHOSPHORYLATION	0.000285714	0.00025	Common
KEGG_SPLICEOSOME	0.00321052	0.002	Common
KEGG_PROTEASOME	0.00928887	0.0056842	Common
KEGG_ENDOCYTOSIS	0.00453845	0.0055135	Common
KEGG_FOCAL_ADHESION	0.00544927	0.00746987	Common
KEGG_GAP_JUNCTION	0.00519297	0.0056883	Common
KEGG_FC_GAMMA_R_MEDIATED_PHAGOCYTOSIS	0.00628204	0.00231579	Common
KEGG_REGULATION_OF_ACTIN_CYTOSKELETON	0.00537312	0.00532352	Common
KEGG_ALZHEIMERS_DISEASE	0.000285714	0.00025	Common
KEGG_PARKINSONS_DISEASE	0.000285714	0.00025	Common
KEGG_HUNTINGTONS_DISEASE	0.000285714	0.00025	Common
KEGG_VIBRIO_CHOLERAE_INFECTION	0.00688371	0.0055135	Common
KEGG_EPITHELIAL_CELL_SIGNALING_IN_HELICOBACTER_PYLORI_INFECTION	0.00537312	0.00806665	Common
KEGG_PATHOGENIC_ESCHERICHIA_COLI_INFECTION	0.00133333	0.000833332	Common
KEGG_PATHWAYS_IN_CANCER	0.00133333	0.000444444	Common
KEGG_ACUTE_MYELOID_LEUKEMIA	0.00470369	0.00464406	Common
BIOCARTA_MTA3_PATHWAY	0.0054857	0.00392727	Common
BIOCARTA_EGF_PATHWAY	0.00630379	0.00490322	Common
BIOCARTA_EPO_PATHWAY	0.00453845	0.00367999	Common
BIOCARTA_FCER1_PATHWAY	0.00308333	0.00106666	Common
BIOCARTA_HIVNEF_PATHWAY	0.00184615	0.000599999	Common
BIOCARTA_KERATINOCYTE_PATHWAY	0.00321052	0.00231579	Common
BIOCARTA_MAPK_PATHWAY	0.00628204	0.00498507	Common
BIOCARTA_VIP_PATHWAY	0.00671427	0.00703702	Common
ST_ERK1_ERK2_MAPK_PATHWAY	0.00470369	0.00392727	Common
PID_FCER1_PATHWAY	0.00537312	0.00481966	Common
PID_GLYPICAN_1PATHWAY	0.00607894	0.00498507	Common
PID_HDAC_CLASSI_PATHWAY	0.002375	0.00125	Common
PID_NFAT_3PATHWAY	0.00321052	0.00231579	Common
PID_MYC_PATHWAY	0.00453845	0.00557332	Common
PID_CERAMIDE_PATHWAY	0.00321052	0.00231579	Common
PID_P53_DOWNSTREAM_PATHWAY	0.00266666	0.002	Common
PID_LIS1_PATHWAY	0.0037619	0.00274418	Common
PID_ERBB1_DOWNSTREAM_PATHWAY	0.00537312	0.00392727	Common
PID_PDGFRB_PATHWAY	0.00321052	0.002	Common
PID_CMYB_PATHWAY	0.00321052	0.002	Common
REACTOME_PYRUVATE_METABOLISM_AND_CITRIC_ACID_TCA_CYCLE	0.00321052	0.00231579	Common
REACTOME_SIGNALLING_BY_NGF	0.00427272	0.00231579	Common
REACTOME_CROSS_PRESENTATION_OF_SOLUBLE_EXOGENOUS_ANTIGENS_ENDOSOMES	0.00453845	0.00481966	Common
REACTOME_TCA_CYCLE_AND_RESPIRATORY_ELECTRON_TRANSPORT	0.000285714	0.00025	Common
REACTOME_ANTIGEN_PROCESSING_CROSS_PRESENTATION	0.00662499	0.0072195	Common
REACTOME_ORC1_REMOVAL_FROM_CHROMATIN	0.00133333	0.00106666	Common
REACTOME_MITOCHONDRIAL_PROTEIN_IMPORT	0.00311999	0.00231579	Common
REACTOME_YAP1_AND_WWTR1_TAZ_STIMULATED_GENE_EXPRESSION	0.00537312	0.00464406	Common
REACTOME_CDK_MEDIATED_PHOSPHORYLATION_AND_REMOVAL_OF_CDC6	0.00537312	0.00323404	Common
REACTOME_TRANSMISSION_ACROSS_CHEMICAL_SYNAPSES	0.00360975	0.00231579	Common
REACTOME_REGULATION_OF_ORNITHINE_DECARBOXYLASE_ODC	0.00338461	0.00277272	Common
REACTOME_RNA_POL_II_TRANSCRIPTION	0.00308333	0.002	Common
REACTOME_RNA_POL_III_TRANSCRIPTION	0.00599999	0.00446428	Common
REACTOME_INTEGRATION_OF_ENERGY_METABOLISM	0.00537312	0.00871577	Common
REACTOME_GLUCONEOGENESIS	0.00688371	0.00592307	Common
REACTOME_CELL_CYCLE_CHECKPOINTS	0.00544927	0.00231579	Common
REACTOME_CYCLIN_E_ASSOCIATED_EVENTS_DURING_G1_S_TRANSITION_	0.00133333	0.000727271	Common
REACTOME_P53_DEPENDENT_G1_DNA_DAMAGE_RESPONSE	0.00321052	0.0035102	Common
REACTOME_POST_CHAPERONIN_TUBULIN_FOLDING_PATHWAY	0.002375	0.002	Common
REACTOME_M_G1_TRANSITION	0.00671427	0.00392727	Common
REACTOME_MRNA_SPLICING	0.00308333	0.00231579	Common
REACTOME_G1_S_TRANSITION	0.00321052	0.002	Common
REACTOME_REGULATION_OF_INSULIN_SECRETION	0.0040465	0.00498507	Common
REACTOME_CDT1_ASSOCIATION_WITH_THE_CDC6_ORC_ORIGIN_COMPLEX	0.00490908	0.00274418	Common
REACTOME_SYNTHESIS_OF_DNA	0.00554929	0.00806665	Common
REACTOME_AUTODEGRADATION_OF_THE_E3_UBIQUITIN_LIGASE_COP1	0.00537312	0.00498507	Common
REACTOME_PYRUVATE_METABOLISM	0.00969229	0.00806665	Common
REACTOME_MITOTIC_G1_G1_S_PHASES	0.00321052	0.00231579	Common
REACTOME_MITOTIC_G2_G2_M_PHASES	0.00453845	0.00492063	Common
REACTOME_DNA_REPAIR	0.00537312	0.00464406	Common
REACTOME_SIGNALING_BY_ILS	0.00905616	0.00747618	Common
REACTOME_RESPIRATORY_ELECTRON_TRANSPORT	0.000285714	0.00025	Common
REACTOME_ASSEMBLY_OF_THE_PRE_REPLICATIVE_COMPLEX	0.00453845	0.00302222	Common
REACTOME_GABA_SYNTHESIS_RELEASE_REUPTAKE_AND_DEGRADATION	0.00360975	0.00274418	Common
REACTOME_REGULATION_OF_MRNA_STABILITY_BY_PROTEINS_THAT_BIND_AU_RICH_ELEMENTS	0.00453845	0.00329166	Common
REACTOME_GABA_B_RECEPTOR_ACTIVATION	0.00448888	0.0055135	Common
REACTOME_GABA_RECEPTOR_ACTIVATION	0.00308333	0.00317391	Common
REACTOME_DESTABILIZATION_OF_MRNA_BY_AUF1_HNRNP_D0	0.00321052	0.00271794	Common
REACTOME_FORMATION_OF_INCISION_COMPLEX_IN_GG_NER	0.00605404	0.00891665	Common
REACTOME_RNA_POL_III_TRANSCRIPTION_INITIATION_FROM_TYPE_3_PROMOTER	0.00308333	0.002	Common
REACTOME_HEMOSTASIS	0.000499999	0.00025	Common
REACTOME_HIV_INFECTION	0.00258823	0.002	Common
REACTOME_HOST_INTERACTIONS_OF_HIV_FACTORS	0.0075632	0.00835163	Common
REACTOME_RNA_POL_III_TRANSCRIPTION_TERMINATION	0.0079318	0.0055135	Common
REACTOME_RESPIRATORY_ELECTRON_TRANSPORT_ATP_SYNTHESIS_BY_CHEMIOSMOTIC_COUPLING_AND_HEAT_PRODUCTION_BY_UNCOUPLING_PROTEINS_	0.000285714	0.00025	Common
REACTOME_AUTODEGRADATION_OF_CDH1_BY_CDH1_APC_C	0.00605404	0.00392727	Common
REACTOME_INNATE_IMMUNE_SYSTEM	0.00671427	0.00703702	Common
REACTOME_TOLL_RECEPTOR_CASCADES	0.00321052	0.002	Common
REACTOME_PLATELET_ACTIVATION_SIGNALING_AND_AGGREGATION	0.002375	0.00106666	Common
REACTOME_S_PHASE	0.00321052	0.00274418	Common
REACTOME_SCFSKP2_MEDIATED_DEGRADATION_OF_P27_P21	0.00305263	0.002	Common
REACTOME_VIF_MEDIATED_DEGRADATION_OF_APOBEC3G	0.00537312	0.0055135	Common
KEGG_APOPTOSIS	0.0116701	0.00871577	JointNormKS
KEGG_ADIPOCYTOKINE_SIGNALING_PATHWAY	0.0124752	0.00903091	JointNormKS
BIOCARTA_CERAMIDE_PATHWAY	0.0124752	0.00962374	JointNormKS
BIOCARTA_PDGF_PATHWAY	0.0116041	0.00806665	JointNormKS
ST_JNK_MAPK_PATHWAY	0.0128461	0.00923998	JointNormKS
REACTOME_DEVELOPMENTAL_BIOLOGY	0.0268366	0.00806665	JointNormKS
REACTOME_NEURONAL_SYSTEM	0.0128461	0.0091313	JointNormKS
REACTOME_MRNA_PROCESSING	0.0105957	0.00871577	JointNormKS
REACTOME_AXON_GUIDANCE	0.0241398	0.00906121	JointNormKS
REACTOME_REGULATION_OF_MITOTIC_CELL_CYCLE	0.0116041	0.00871577	JointNormKS
REACTOME_METABOLISM_OF_LIPIDS_AND_LIPOPROTEINS	0.0445391	0.00996077	JointNormKS
REACTOME_APC_C_CDC20_MEDIATED_DEGRADATION_OF_MITOTIC_PROTEINS	0.0129159	0.00806665	JointNormKS
REACTOME_ACTIVATED_TLR4_SIGNALLING	0.0129159	0.0055135	JointNormKS
KEGG_CELL_CYCLE	0.00607894	0.0112727	Single
PID_FOXO_PATHWAY	0.00519297	0.01175	Single
REACTOME_RESPONSE_TO_ELEVATED_PLATELET_CYTOSOLIC_CA2_	0.00671427	0.0112727	Single
